# Supplementary material for: A facilely controlled length, cytotoxicity, length-dependent and cell type-dependent cellular uptake of silica nanotubes and their applications in the delivery of immunostimulatory CpG oligodeoxynucleotides
Source: Royal Society of Chemistry journal article supplement (doi:10.1039/c5tb01270h), 2015-01-01
Supplement: c5tb01270h1.pdf [file c5tb01270h1.pdf]

## Supplementary Information

A Facilely Controlled Length, Cytotoxicity, Length-dependent and Cell Type-Dependent Cellular Uptake of Silica Nanotubes and Their Application for Delivery of Immunostimulatory CpG Oligodeoxynucleotides

Song Chen,<sup>\*a,b</sup> Qiqing Zhang,<sup>c,d</sup> Lan Jia,<sup>a</sup> XinXin Du<sup>a</sup> and Nobutaka Hanagata<sup>\*b</sup>

<sup>a</sup>College of Materials Science and Engineering, Taiyuan University of Technology, Taiyuan 030024, China

<sup>b</sup>Biomaterials Unit, National Institute for Materials Science, 1-2-1 Sengen, Tsukuba, 3050047, Japan

<sup>c</sup>Tianjin Key Laboratory of Biomedical Materials, Institute of Biomedical Engineering, Chinese Academy of Medical Sciences & Peking Union Medical College, Tianjin 300192, China

<sup>d</sup>Institute of Biomedical and Pharmaceutical Technology, Fuzhou University, Fuzhou 350002, China

E-mail address: [chensong2009@126.com](mailto:chensong2009@126.com); [HANAGATA.Nobutaka@nims.go.jp](mailto:HANAGATA.Nobutaka@nims.go.jp)

Figure S1

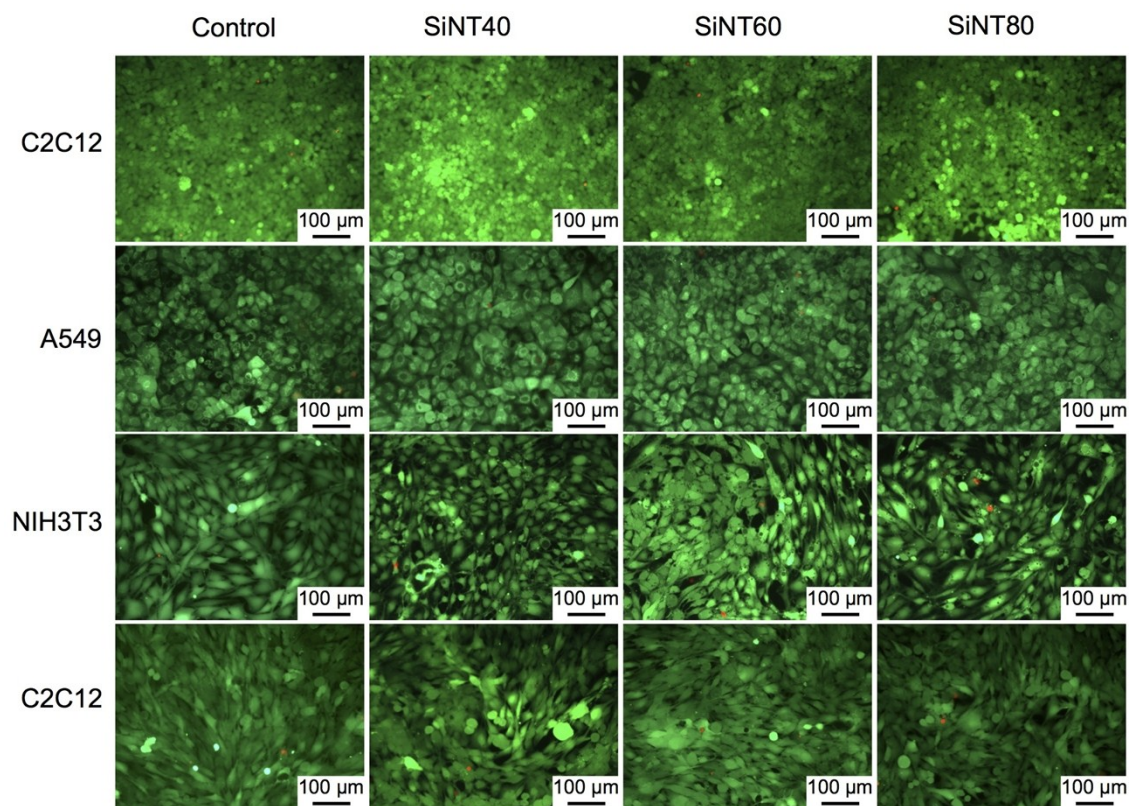

**Figure S1.** Representative fluorescent microscopy images of four cell lines: 293XL-hTLR9, A549, NIH3T3, and C2C12 after incubation with SiNT40, SiNT60, and SiNT80 with a common range concentration of 100  $\mu\text{g}/\text{mL}$ . Cells were stained with Live/Dead agents. The viable cells were stained with calcium-AM and exhibited green fluorescence, while the dead cells were stained with ethidium homodimer-1 and exhibited red fluorescence.

Figure S2

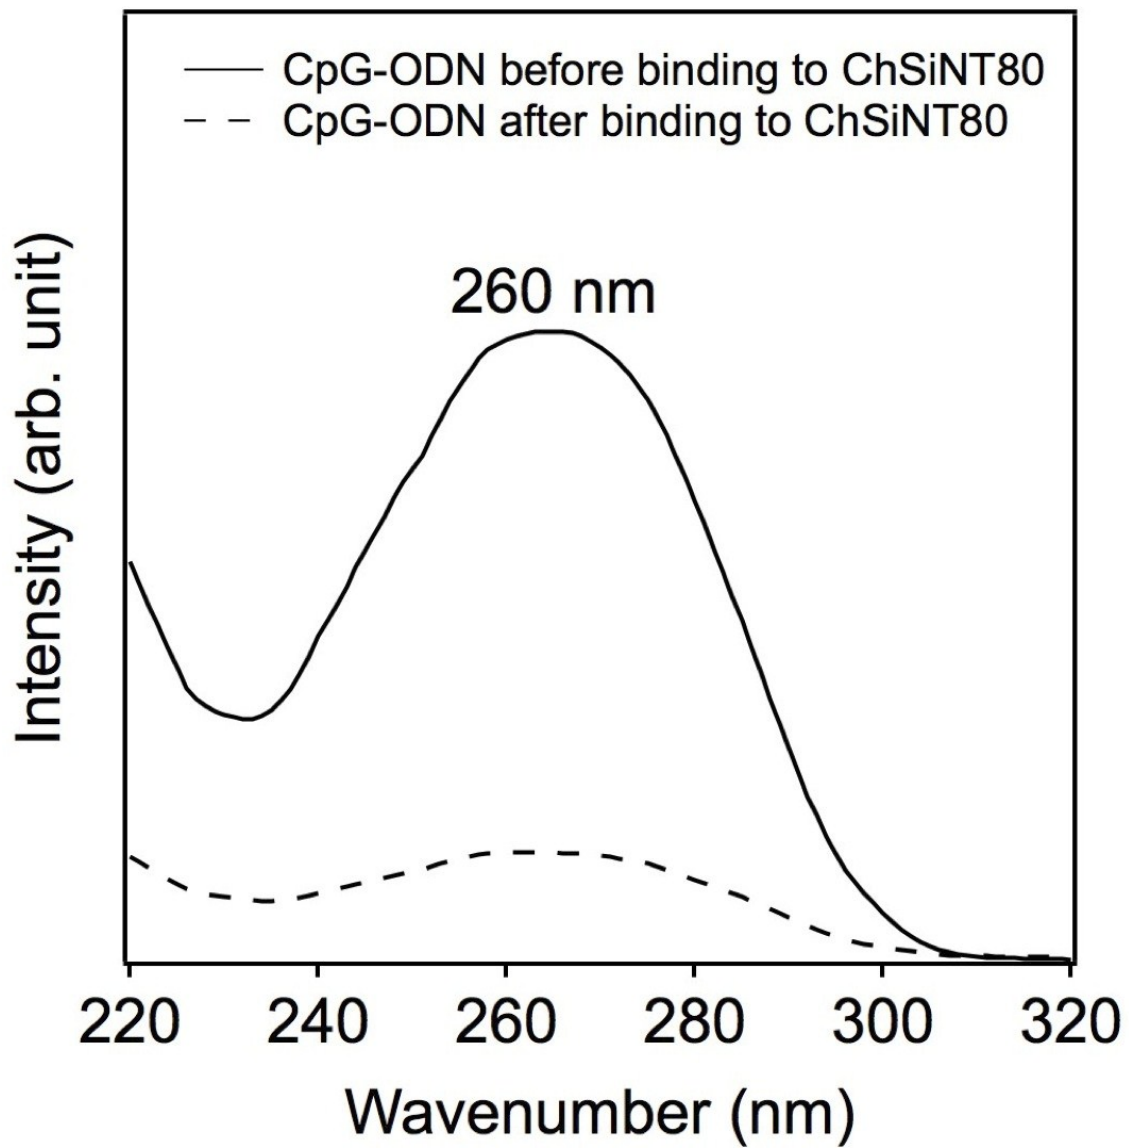

**Figure S2.** UV spectra of CpG-ODN before and after binding to ChSiNT80.
